# Supplementary material
Source: PubMed Central journal article supplement (PMC167046)

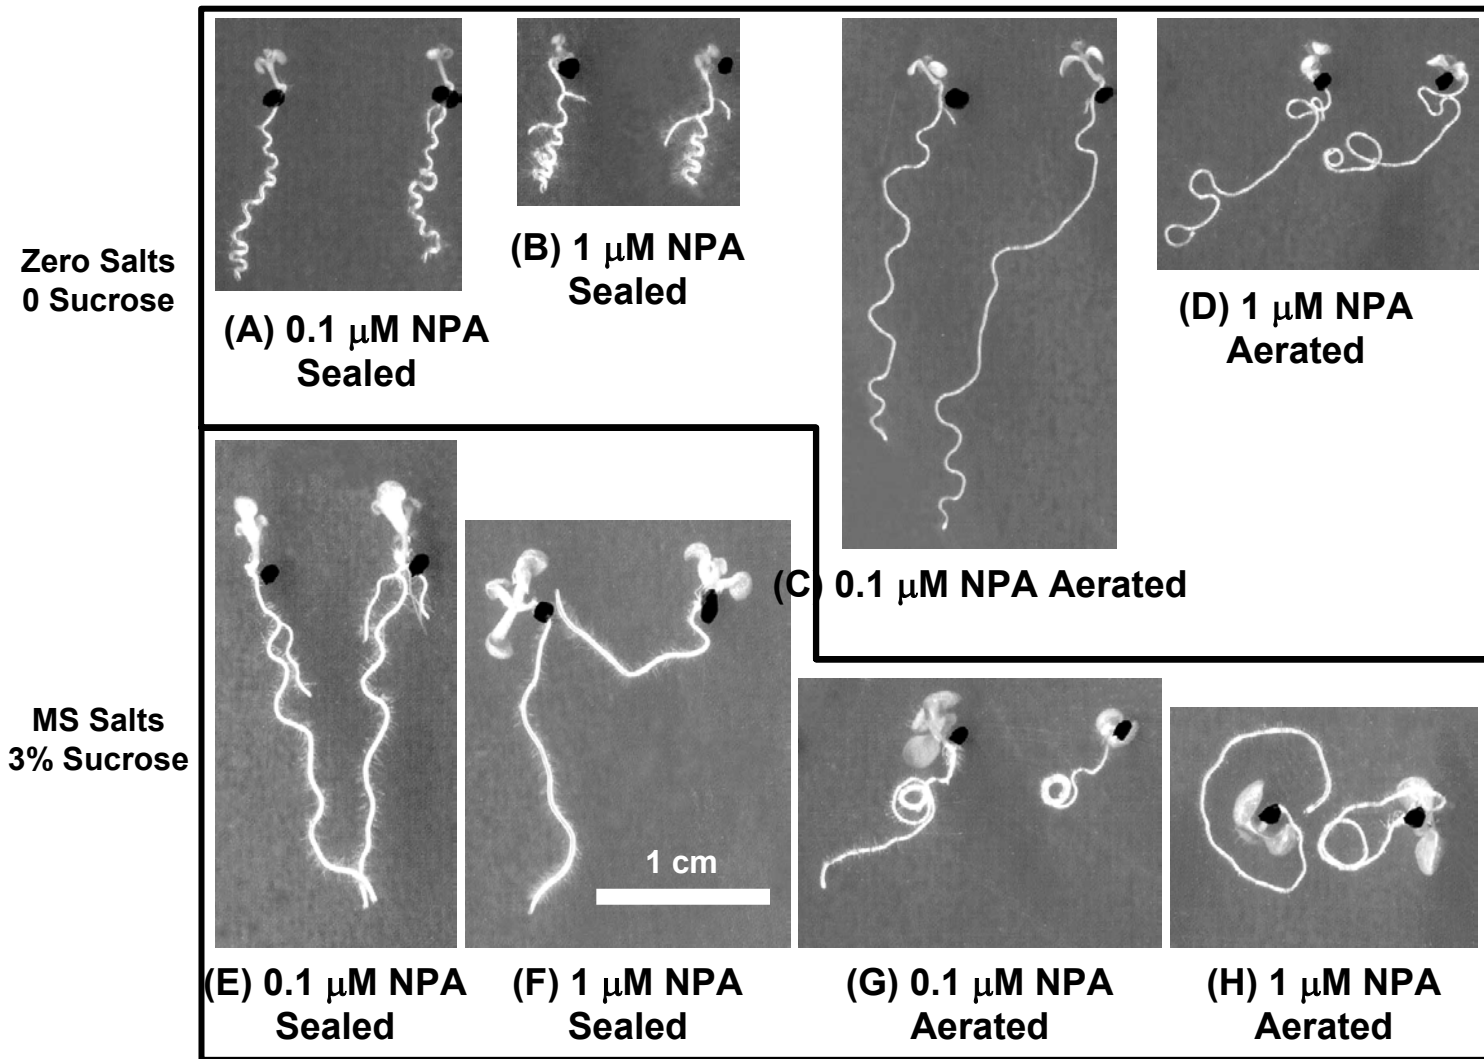

Supplement: plntphys_132_2_1085__1.pdf [file plntphys_132_2_1085__1.pdf]
